# Supplementary material for: Short communication: Concentrated impacts by tree canopy drips: hotspots of soil erosion in forests
Source: Copernicus journal article supplement (doi:10.5194/esurf-2023-16), 2023-06-01
Supplement: Supplementary file 1 [file esurf-2023-16-supplement.pdf]

| Type     | Event | mm<br>Rainfall | J/m2<br>TKE | g<br>LoS |
|----------|-------|----------------|-------------|----------|
| General  | 1     | 41.7           | 291.964     | 3.94     |
| General  | 1     | 20.4           | 525.387     | 7.09     |
| General  | 1     | 20.4           | 271.215     | 3.66     |
| General  | 1     | 22.8           | 125.974     | 1.7      |
| General  | 1     | 25.2           | 156.356     | 2.11     |
| Impact   | 1     | 331.7          | 8868.592    | 119.68   |
| Freefall | 1     | 35.36777       | 133.385     | 1.8      |
| Freefall | 1     | 36.15372       | 145.241     | 1.96     |
| Freefall | 1     | 36.15372       | 172.659     | 2.33     |
| Freefall | 1     | 36.15372       | 174.882     | 2.36     |
| Freefall | 1     | 36.15372       | 176.364     | 2.38     |
| General  | 2     | 9.117024       | 105.967     | 1.43     |
| General  | 2     | 8.959834       | 180.81      | 2.44     |
| General  | 2     | 8.331074       | 85.959      | 1.16     |
| General  | 2     | 8.488264       | 61.505      | 0.83     |
| General  | 2     | 8.802644       | 67.433      | 0.91     |
| General  | 2     | 10.68892       | 110.413     | 1.49     |
| Impact   | 2     | 40.39785       | 3307.196    | 44.63    |
| Freefall | 2     | 11.78926       | 48.908      | 0.66     |
| Freefall | 2     | 11.94645       | 45.944      | 0.62     |
| Freefall | 2     | 12.10364       | 45.944      | 0.62     |
| Freefall | 2     | 11.78926       | 45.944      | 0.62     |
| Freefall | 2     | 11.63206       | 52.613      | 0.71     |
| General  | 3     | 30.49487       | 226.754     | 3.06     |
| General  | 3     | NA             | 709.161     | 9.57     |
| General  | 3     | 27.03669       | 341.613     | 4.61     |
| General  | 3     | 31.12363       | 329.015     | 4.44     |
| General  | 3     | 35.21058       | 343.836     | 4.64     |
| General  | 3     | 61.61851       | 427.572     | 5.77     |
| Impact   | 3     | 314.3801       | 7737.046    | 104.41   |
| Freefall | 3     | 44.3276        | 360.138     | 4.86     |
| Freefall | 3     | 44.01322       | 306.785     | 4.14     |
| Freefall | 3     | 43.07008       | 327.533     | 4.42     |
| Freefall | 3     | 42.7557        | 439.428     | 5.93     |
| Freefall | 3     | 42.7557        | 489.077     | 6.6      |
| General  | 4     | 28.29421       | 287.518     | 3.88     |
| General  | 4     | 28.60859       | 821.797     | 11.09    |

|          |   |          |          |        |
|----------|---|----------|----------|--------|
| General  | 4 | 25.46479 | 258.618  | 3.49   |
| General  | 4 | 27.35107 | 291.964  | 3.94   |
| General  | 4 | 30.49487 | 417.938  | 5.64   |
| General  | 4 | 45.58512 | 243.056  | 3.28   |
| Impact   | 4 | 314.3801 | 8166.1   | 110.2  |
| Freefall | 4 | 38.98314 | 267.51   | 3.61   |
| Freefall | 4 | 37.72562 | 284.554  | 3.84   |
| Freefall | 4 | 39.29752 | 299.374  | 4.04   |
| Freefall | 4 | 39.29752 | 312.713  | 4.22   |
| Freefall | 4 | 38.66876 | 303.82   | 4.1    |
| General  | 5 | 29.55173 | 308.267  | 4.16   |
| General  | 5 | 17.29091 | 447.579  | 6.04   |
| General  | 5 | 13.51835 | 151.169  | 2.04   |
| General  | 5 | 14.46149 | 174.141  | 2.35   |
| General  | 5 | 15.40463 | 94.851   | 1.28   |
| General  | 5 | 33.00991 | 572.813  | 7.73   |
| Impact   | 5 | 268.1663 | 6181.634 | 83.42  |
| Freefall | 5 | 24.83603 | 15.562   | 0.21   |
| Freefall | 5 | 24.83603 | 17.044   | 0.23   |
| Freefall | 5 | 25.15041 | 28.9     | 0.39   |
| Freefall | 5 | 24.52165 | 42.979   | 0.58   |
| Freefall | 5 | 24.83603 | 19.267   | 0.26   |
| General  | 6 | 41.1838  | 752.141  | 10.15  |
| General  | 6 | 33.63867 | 594.302  | 8.02   |
| General  | 6 | 29.86611 | 904.051  | 12.2   |
| General  | 6 | 31.12363 | 979.636  | 13.22  |
| General  | 6 | 34.89619 | 1101.164 | 14.86  |
| General  | 6 | 64.13355 | 1028.543 | 13.88  |
| Impact   | 6 | 394      | 11571    | 156.23 |
| Freefall | 6 | 53.44462 | 509.825  | 6.88   |
| Freefall | 6 | 54.38776 | 510.567  | 6.89   |
| Freefall | 6 | 53.44462 | 588.374  | 7.94   |
| Freefall | 6 | 53.13024 | 603.195  | 8.14   |
| Freefall | 6 | 56.27404 | 594.302  | 8.02   |
| General  | 7 | 4.244132 | 145.241  | 1.96   |
| General  | 7 | 5.265867 | 320.123  | 4.32   |
| General  | 7 | 4.872892 | 174.141  | 2.35   |
| General  | 7 | 4.086942 | 251.208  | 3.39   |
| General  | 7 | 3.851157 | 244.538  | 3.3    |

|          |    |          |          |          |
|----------|----|----------|----------|----------|
| General  | 7  | 4.794297 | 203.041  | 2.74     |
| Impact   | 7  | 9.431404 | 769.184  | 10.38    |
| Freefall | 7  | 4.951487 | 20.749   | 0.28     |
| Freefall | 7  | 5.108677 | 23.713   | 0.32     |
| Freefall | 7  | 5.423057 | 34.828   | 0.47     |
| Freefall | 7  | 5.187272 | 34.828   | 0.47     |
| Freefall | 7  | 4.715702 | 18.526   | 0.25     |
| General  | 8  | 65.7     | 1312.356 | 17.71    |
| General  | 8  | 62.2     | 1351.63  | 18.24    |
| General  | 8  | 52.8     | 2709.93  | 36.57    |
| General  | 8  | 46.2     | 1428.697 | 19.28    |
| General  | 8  | 53.4     | 1450.928 | 19.58    |
| General  | 8  | 61       | 2083.022 | 28.11    |
| Impact   | 8  | 704.8616 | 20723    | 157.14   |
| Freefall | 8  | 95.9     | 313.454  | 4.23     |
| Freefall | 8  | 96.2     | 278.626  | 3.76     |
| Freefall | 8  | 96.2     | 300.856  | 4.06     |
| Freefall | 8  | 97.1     | 408.305  | 5.51     |
| Freefall | 8  | 99.3     | 309.749  | 4.18     |
| General  | 9  | 45.58512 | 898.864  | 12.13    |
| General  | 9  | 32.06677 | 731.392  | 9.87     |
| General  | 9  | 29.55173 | 1227.879 | 16.57    |
| General  | 9  | 28.29421 | 878.115  | 11.85    |
| General  | 9  | 31.75239 | 820.315  | 11.07    |
| General  | 9  | 65.70545 | 1527.994 | 20.62    |
| Impact   | 9  | 440.6528 | 12955    | 156.53   |
| Freefall | 9  | 62.87603 | 5.704    | 0.076976 |
| Freefall | 9  | 58.16032 | 7.82     | 0.105529 |
| Freefall | 9  | 59.73223 | 6.401    | 0.086381 |
| Freefall | 9  | 60.36099 | 7.099    | 0.095802 |
| Freefall | 9  | 61.93289 | 9.297    | 0.125456 |
| General  | 10 | 21.69223 | 600.972  | 8.11     |
| General  | 10 | 31.12363 | 1028.543 | 13.88    |
| General  | 10 | 17.60529 | 798.084  | 10.77    |
| General  | 10 | 14.14711 | 541.69   | 7.31     |
| General  | 10 | 17.76248 | 558.733  | 7.54     |
| General  | 10 | 29.86611 | 709.161  | 9.57     |
| Impact   | 10 | 197.6995 | 11136.87 | 150.29   |
| Freefall | 10 | 26.25074 | 6.669    | 0.09     |

|          |    |          |        |      |
|----------|----|----------|--------|------|
| Freefall | 10 | 26.25074 | 8.892  | 0.12 |
| Freefall | 10 | 26.72231 | 11.115 | 0.15 |
| Freefall | 10 | 26.8795  | 21.49  | 0.29 |
| Freefall | 10 | 29.86611 | 13.338 | 0.18 |
